# Supplementary material
Source: Royal Society of Chemistry journal article supplement (doi:10.1039/d5re00563a)
Supplement: d5re00563a1.xlsx [file d5re00563a1.xlsx]

## Sheet: NSRL Exp data
Pyrolysis species (ppm)
Temperature (K)	JP-10	C2H2	C2H4	aC3H4	pC3H4	C3H5	C3H6	C4H4	C4H6	C4H8	C5H5	C5H6	c-C5H8	C6H6-b	C6H8	C6H10	C7H8-t	C8H8-S	C8H10	C9H8	C9H10
	Exo-TCD	Acetylene	Ethylene	Allene	Propyne	Allyl	Propene	Vinylacetylene	1,3-Butadiene	1-Butene	Cyclopentadienyl radical	Cyclopentadiene	Cyclopentene	Benzene	1,3-Cyclohexadiene	Cyclohexene	Toluene	Styrene	o-Xylene	Indene	Indane
1075	3000
1100	2997.07
1125	2932.59						9.23673					57.4216
1150	2790.69		115.711			14.015	18.5743		11.6816			91.5132	11.9962	41.3795
1175	2586.12		247.65	9.13669	7.29618	36.5036	47.6993		25.3317		5.11794	220.463	29.6798	148.896	4.87382		64.5012		3.30081
1200	2318.85	17.4798	556.724	32.9418	8.91415	86.1342	136.262		36.9555	19.0769	23.6259	334.623	43.486	204.565	11.9534		73.0798	1.43271	5.38915		3.61588
1225	2031.51	40.627	785.482	57.7065	55.1897	121.985	219.42		57.9902	38.377	34.8444	627.412	66.913	236.176	28.0604	3.81075	105.005	3.34803	9.6458		5.37937
1250	1572.76	60.7709	1275.64	90.9334	66.7708	104.384	323.55	13.3225	94.2951	66.6105	67.3607	866.082	88.3299	415.924	48.5707	6.35383	153.122	1.9183	12.7151	2.45817	7.93422
1275	1035.73	166.866	1747.55	207.054	93.9913	80.4429	416.832	18.938	119.984	111.075	114.137	1170.11	90.0487	534.972	73.849	8.67482	179.079	5.53789	12.7121	5.47216	17.1555
1300	555.296	269.976	2206.69	267.964	196.834	73.2226	510.849	34.5418	143.612	151.551	166.307	1429.52	82.7511	641.854	98.261	10.4401	199.944	8.95428	18.1043	11.2296	15.995
1325	292.06	322.617	2445.62	354.104	207.84	54.688	517.328	44.58	169.288	127.668	211.29	1491.23	71.7781	793.331	118.843	16.3623	173.153	25.0478	16.6485	15.367	16.4184
1350	155.883	450.481	2775.65	343.014	270.284	46.9685	467.941	46.5261	158.066	59.8718	221.244	1459.31	65.6381	842.309	90.9785	19.1455	153.61	36.9173	9.34952	18.5933	14.4096
Equivalence ratio = 1.0 species (ppm)
Temperature (K)	JP-10	CO	CH2O	C2H2	C2H2O	C2H4	aC3H4	pC3H4	C3H5	C3H6	C4H4	C4H4O	C4H6	C4H8	C5H5	C5H6	c-C5H8	C6H6-b	C6H8	C7H6O	C7H8	C8H8	C8H10	C9H8
	Exo-TCD	Carbon monoxide	Formaldehyde	Acetylene	Ketene	Ethylene	Allene	Propyne	Allyl	Propene	Vinylacetylene		1,3-Butadiene	1-Butene	Cyclopentadienyl radical	Cyclopentadiene	Cyclopentene	Benzene	1,3-Cyclohexadiene	Benzaldehyde	Toluene	Styrene	o-Xylene	Indene
1075	3000
1100	3023.15
1125	2992.64	8.96143				40.0676						5.65082	0.88128			37.914	11.6591						1.2247
1150	2880.65	16.8324				40.1196			25.6659	13.2359		18.8162	3.2211			77.0111	23.0699	18.5165	3.76504	7.19264	18.5044		4.01007
1175	2718.06	33.0372	10.5114			240.997		10.1603	35.6596	40.8648		17.4285	3.96115		4.99421	147.046	57.3785	30.6868	11.6648	17.858	48.3024		2.78575
1200	2419.25	48.3063	29.9244	16.8528		567.242	17.292	7.43737	50.7957	140.12	1.61935	49.4494	15.1209	25.705	25.2772	321.318	64.8061	86.7084	17.9705	28.2207	52.5292	1.53087	11.9046
1225	1957.14	98.2331	58.9414	29.5613	13.727	908.846	53.4868	41.0037	96.0966	210.481	6.2808	85.6535	47.0397	44.5651	48.7774	583.867	85.0863	221.773	38.7799	48.7472	100.038	4.22536	21.312	3.28342
1250	1426.21	150.812	86.9928	86.5567	20.8931	1350.98	89.1812	66.2656	113.83	316.053	14.8178	99.5447	76.1581	99.742	72.0628	879.789	111.469	341.344	67.0159	66.3696	157.833	8.22382	28.0719	6.03891
1275	886.882	323.477	121.758	137.449	31.7126	1769.5	166.465	101.379	84.0976	402.868	21.6	116.308	123.828	149.409	96.3735	1159.11	95.9772	481.242	90.0365	82.1493	174.814	16.7052	35.7956	9.88763
1300	520.856	403.867	157.877	211.346	58.0117	2093.26	243.32	135.658	73.0406	526.523	30.2737	117.911	189.093	132.879	168.724	1376.65	69.6324	581.721	100.968	80.2892	161.772	24.7677	41.454	12.0816
1325	262.488	559.202	180.273	287.35	83.6098	2307.55	286.97	161.638	31.7175	522.882	41.0524	110.024	169	95.5942	185.826	1493.66	53.6262	661.507	92.8422	71.3688	155.781	35.0903	40.1955	15.2336

## Sheet: SKLE Exp data
Equivalence ratio = 0.75 (ppm)
Fuel conversion	JP-10	O2	H2	CH4	C2H2	C2H4	C3H6	C5H6	C5H8	C6H6	C7H8	CO
21.3903	362.398	43.0742	43.0742	4.58642	4.27133	79.19	11.5336	57.2962	10.5767	19.848	7.38498	44.7361
20.6895	365.629	37.6362	37.6362	4.00864	4.042	66.7009	10.1374	52.6128	9.53432	17.4205	6.2977	37.0671
16.5272	384.818	34.011	34.011	3.10864	3.46867	56.459	9.86426	45.3989	8.89052	15.3003	4.59767	32.913
14.4164	394.549	27.6572	27.6572	3.00864	2.89533	47.2914	7.86107	40.7154	7.6949	13.0681	3.30663	25.883
13.106	400.59	22.5182	22.5182	2.00864	2.26467	38.9809	6.98087	31.9529	6.86716	10.4566	3.3462	25.2439
10.3011	413.52	15.6413	15.6413	1.20864	1.51933	30.2109	4.94731	22.9637	5.51826	8.09016	1.95143	12.7817
9.15798	418.791	8.39064	8.39064	0.908642	0.974667	22.6844	4.12782	13.4837	3.40292	7.05674	1.59538	7.66905
7.08556	428.345	3.30766	3.30766	0.608642	0.630667	11.2173	2.12461	8.40103	2.2073	5.13165	1.18322	4.47361
5.45201	435.875	1.25205	1.25205	0	0.258	4.2298	1.15336	5.62409	1.53285	4.37315	0.874729	6.71042
1.4	441.01	0.28031	0.28031	0	0.0573333	0.0745333	0.151758	0.0755388	0.582483	2.44884	0.177977	1.59772

## Sheet: Temperature profile
Temperature profile for NSRL profile										Temperature profile for SKLE profile
	Temperature(℃)										Temperature(K)
Distance(mm)	700	750	800	850	900	950	1000			Distance(cm)	1100 K
0	555.24	567.828	578.528	589.14	596.6	605.612	614.104			45	1076.35
5	575.395	592.582	608.041	623.392	635.887	649.789	663.219			42.5	1103.45
10	595.55	617.335	637.554	657.645	675.175	693.966	712.335			40	1105.75
20	635.86	666.842	696.58	726.15	753.75	782.32	810.565			37.5	1105.35
30	669.91	706.527	742.401	778.504	813.11	848.453	883.549			35	1104.85
40	692.38	733.486	773.88	814.273	853.445	893.218	932.79			32.5	1101.45
50	707.22	751.034	794.29	837.575	879.875	922.66	965.283			30	1097.65
60	716.06	762.082	807.632	853.16	897.9	943.028	988.026			27.5	1091.65
70	724.69	771.993	818.769	865.344	911.21	957.425	1003.52			25	1082.65
80	727.19	775.243	823.111	871.179	918.735	966.543	1014.27			22.5	1079.65
90	727.9	776.63	825.384	874.547	923.355	972.338	1021.26			20	1099.65
100	730.82	780.654	830.453	880.514	930.26	980.161	1030.01			17.5	1108.05
110	732.95	783.315	833.384	883.297	932.855	982.588	1032.26			15	1101.75
130	731.16	781.952	832.521	882.981	933.165	983.485	1033.76			12.5	1101.05
150	722.37	773.089	823.658	874.165	924.475	974.882	1025.26			10	1094.55
170	713.79	764.363	814.59	864.448	914.07	963.808	1013.51			7.5	1084.25
190	709.5	761.25	812.59	863.448	914.07	964.808	1015.51			5	1074.65
210	709	761.5	813.658	865.415	916.975	968.632	1020.26			2.5	1054.85
230	703	756	808.726	861.132	913.38	965.706	1018.01			0	974.55
250	696	750.5	804.863	859.066	913.19	967.353	1021.5
270	690.5	748.75	806.863	864.816	922.69	980.603	1038.5
290	665	728.5	792	855.5	919	982.5	1046
310	580.5	646.25	712	777.75	843.5	909.25	975
320	508	569	630	691	752	813	874
330	429	483	537	591	645	699	753
340	348.5	391.75	435	478.25	521.5	564.75	608
350	274.5	306.75	339	371.25	403.5	435.75	468
360	209	233.5	258	282.5	307	331.5	356
370	158.5	175.75	193	210.25	227.5	244.75	262
380	117.5	129.75	142	154.25	166.5	178.75	191
390	92	100.5	109	117.5	126	134.5	143
400	76	81	86	91	96	101	106
